# Supplementary material for: Optimizing Dacarbazine Therapy: Design of a Laser-Triggered Delivery System Based on β-Cyclodextrin and Plasmonic Gold Nanoparticles
Source: MDPI journal article supplement (doi:10.3390/pharmaceutics15020458), 2023-01-30
Supplement: s1 [file s1]

### S1. XRD zoom and additionally SEM micrographs

Figure S1 shows the XRD zoom of  $\beta$ -cyclodextrin@dacarbazine complex and physical mixture of the pure species.

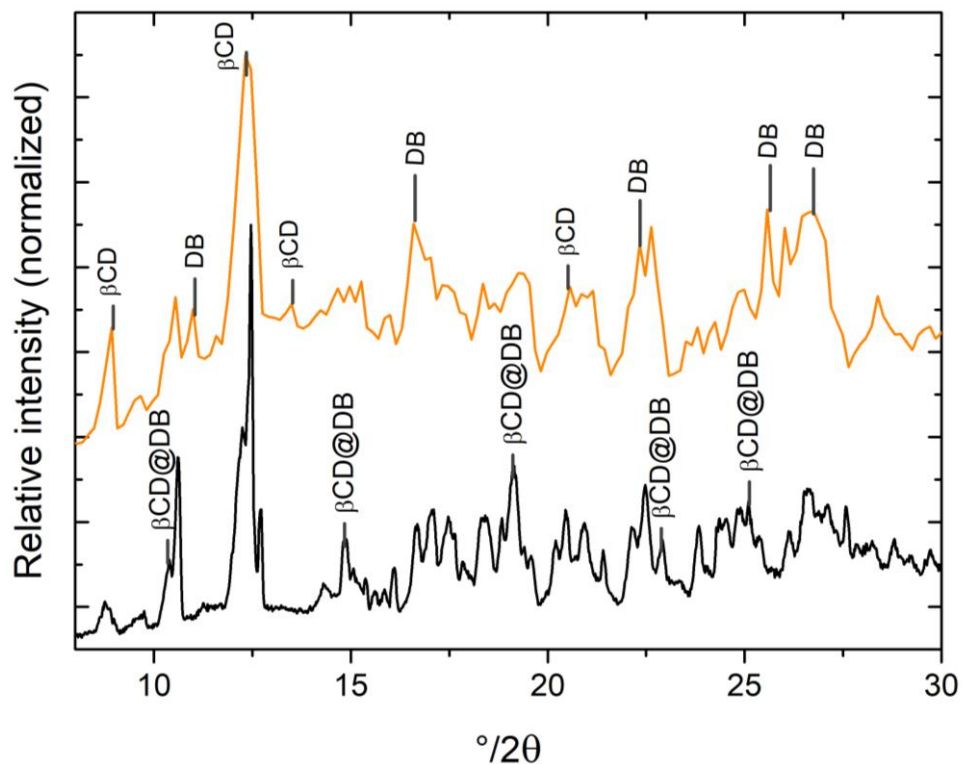

**Figure S1.** Powder X-ray diffractogram zoom of the  $\beta$ -cyclodextrin@dacarbazine complex (black) and physical mixture between  $\beta$ -cyclodextrin and dacarbazine (orange).

Figure S2 shows the SEM micrograph of  $\beta$ -cyclodextrin and dacarbazine. Table S1 shows the average crystal length values of  $\beta$ -cyclodextrin, dacarbazine, and  $\beta$ -cyclodextrin@dacarbazine, which were calculated using the SEM images of the article and the supplementary material. Furthermore, this length measurement was made only for the largest crystals.

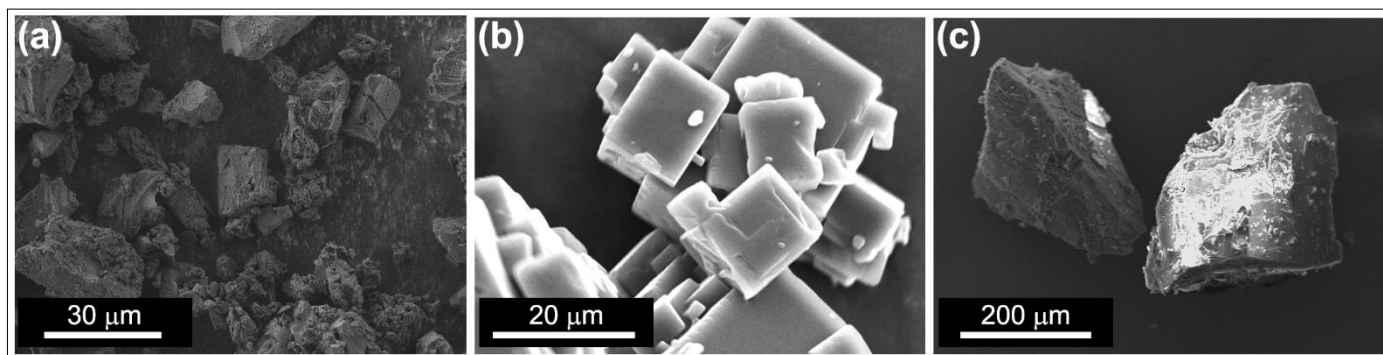

**Figure S2.** SEM micrograph of  $\beta$ -cyclodextrin (a), dacarbazine (b), and field emission SEM micrograph of  $\beta$ -cyclodextrin@dacarbazine (c).

**Table S1.** Average length values of the complex and its pure species, obtained from the SEM images

| <b>Cristalline compound</b>       | <b>Average length and SD (nm)</b> |
|-----------------------------------|-----------------------------------|
| $\beta$ -cyclodextrin             | $23 \pm 8$                        |
| Dacarbazine                       | $30 \pm 17$                       |
| $\beta$ -cyclodextrin@dacarbazine | $302 \pm 122$                     |

## S2. $^1\text{H}$ -NMR spectra

Figure S3 shows the  $^1\text{H}$ -NMR spectra of the pure species and the  $\beta$ -cyclodextrin@dacarbazine complex formed.

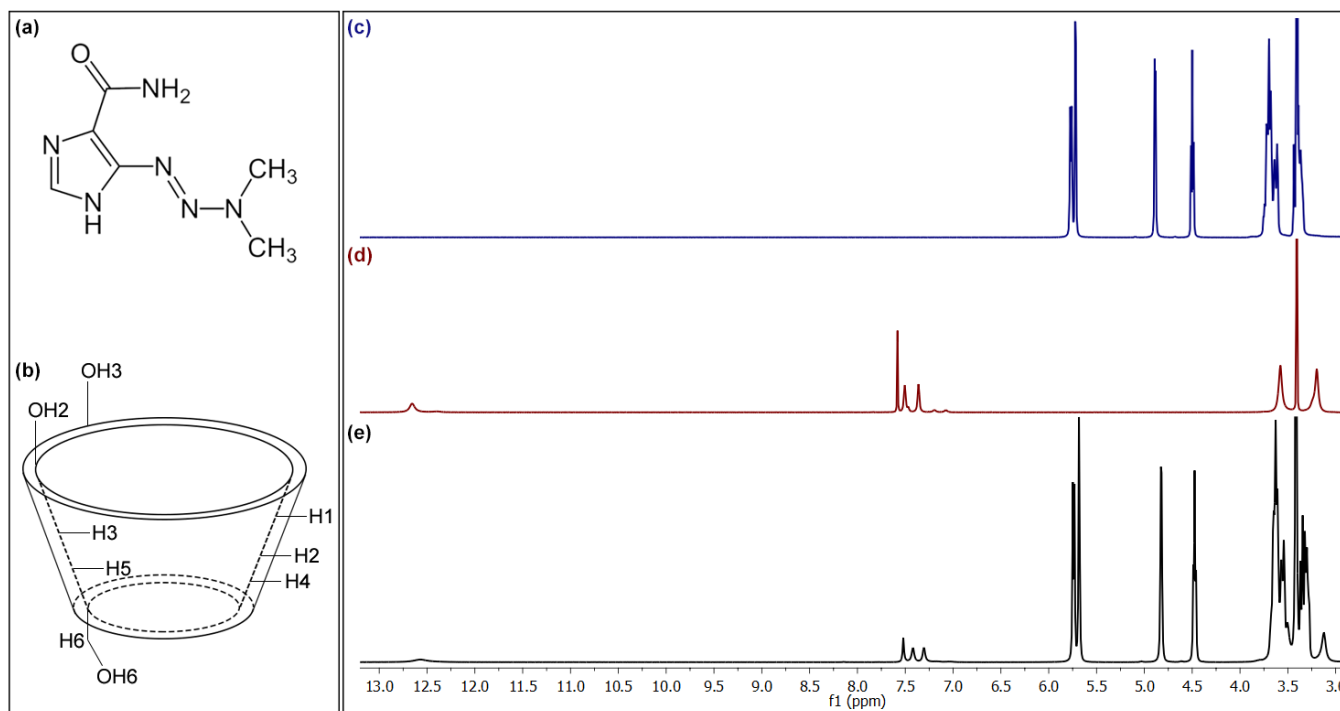

**Figure S3.** (a) Molecular structure of dacarbazine in its two tautomeric forms; (b) Cone-type model of  $\beta$ -cyclodextrin indicating the orientation of its protons, which are represented for a unit of glucose.  $^1\text{H}$ -NMR spectra of: (c)  $\beta$ -cyclodextrin; (d) dacarbazine; and (e)  $\beta$ -cyclodextrin@dacarbazine complex, obtained in  $\text{DMSO-d}_6$ .

### S3. Stoichiometric ratio of $\beta$ -cyclodextrin@dacarbazine complex

The stoichiometric ratio was calculated by comparing the integration of the proton signals  $\beta$ -cyclodextrin (H1) and dacarbazine ( $\text{CH}_3$  and NH) in the  $^1\text{H}$ -NMR spectra of the  $\beta$ -cyclodextrin@dacarbazine complex (see figure S4). Values are shown in table S1.

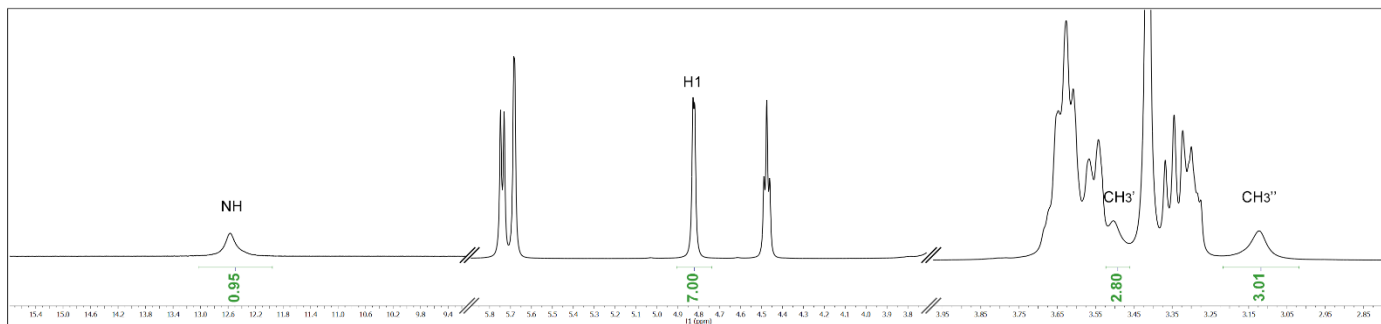

**Figure S4.** Integrated signals of dacarbazine and  $\beta$ -cyclodextrin protons in the  $^1\text{H}$ -NMR spectrum of the  $\beta$ -cyclodextrin@dacarbazine complex.

**Table S2.** Values of the integrated signals of dacarbazine and  $\beta$ -cyclodextrin using the  $^1\text{H}$ -NMR spectrum of the complex formed.

| Integration of dacarbazine protons |                 |      | Integration of $\beta$ -cyclodextrin proton |
|------------------------------------|-----------------|------|---------------------------------------------|
| $\text{CH}_3'$                     | $\text{CH}_3''$ | NH   | (reference used)                            |
| 2.80                               | 3.01            | 0.95 | $\text{H1}/f = 7$                           |

#### S4. Two-dimensional NMR spectrum and docking

Figure S5 shows the full ROESY spectra of the  $\beta$ -cyclodextrin@dacarbazine complex.

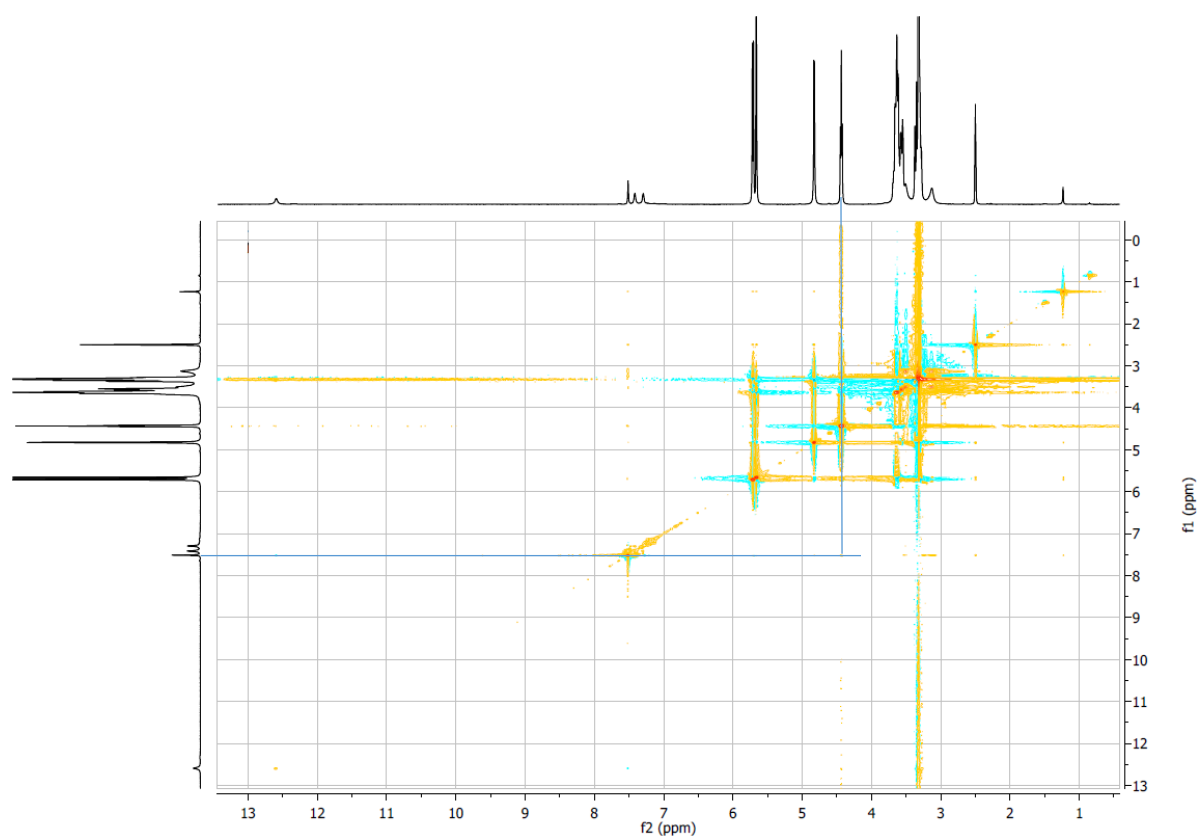

**Figure S5.** ROESY spectra of the  $\beta$ -cyclodextrin@dacarbazine complex.

## S5. Pharmacological parameters of the complex

Figure S6 shows the relation between absorbance at 237 nm of DB solution versus its concentration. The slope corresponds to nanomolar absorptivity coefficient ( $\epsilon$ ). Figure S7 shows the relation between the concentrations of dacarbazine solubilized versus the concentrations of  $\beta$ -cyclodextrin. The slope corresponds to degree of solubilization.

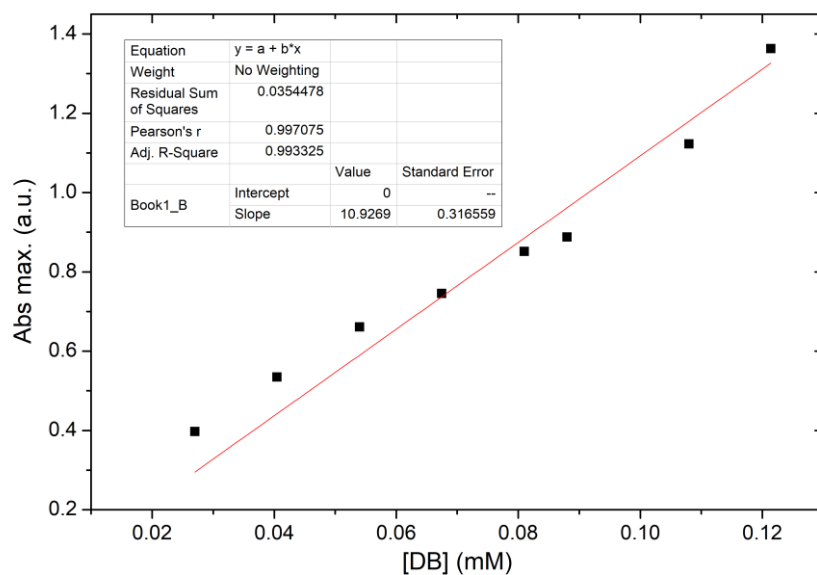

**Figure S6.** Graph of maximum absorbance at 237 nm versus dacarbazine concentration.

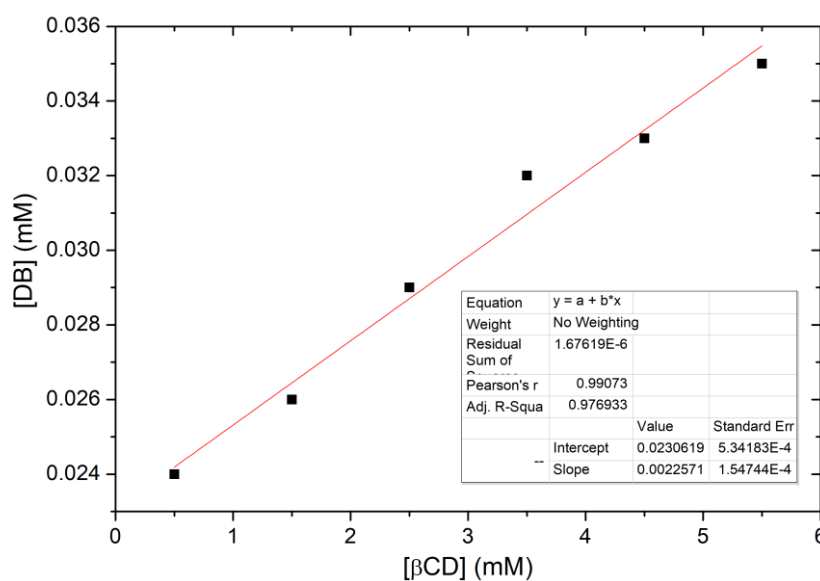

**Figure S7.** Graph of concentrations of: solubilized dacarbazine versus  $\beta$ -cyclodextrin used.

## S6. Characterization of gold nanoparticles

Figure S8 shows the hydrodynamic diameter distribution by intensity of gold nanoparticles stabilized using: citrate and PEG- $\beta$ -cyclodextrin@dacarbazine, obtained by dynamic light scattering.

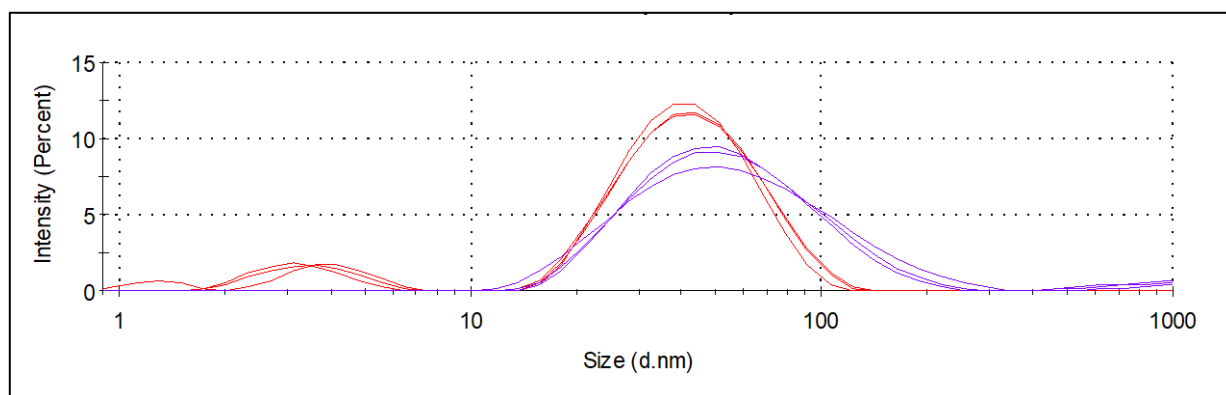

**Figure S8.** Hydrodynamic diameter distribution by intensity of gold nanoparticles stabilized with: citrate (red) and PEG- $\beta$ -cyclodextrin@dacarbazine (purple).

Figure S9 shows the micrograph of gold nanoparticles as they were synthesized. Next, Figure S10 and S11 show the size histograms of gold nanoparticles stabilized using: citrate and PEG- $\beta$ -cyclodextrin@dacarbazine,

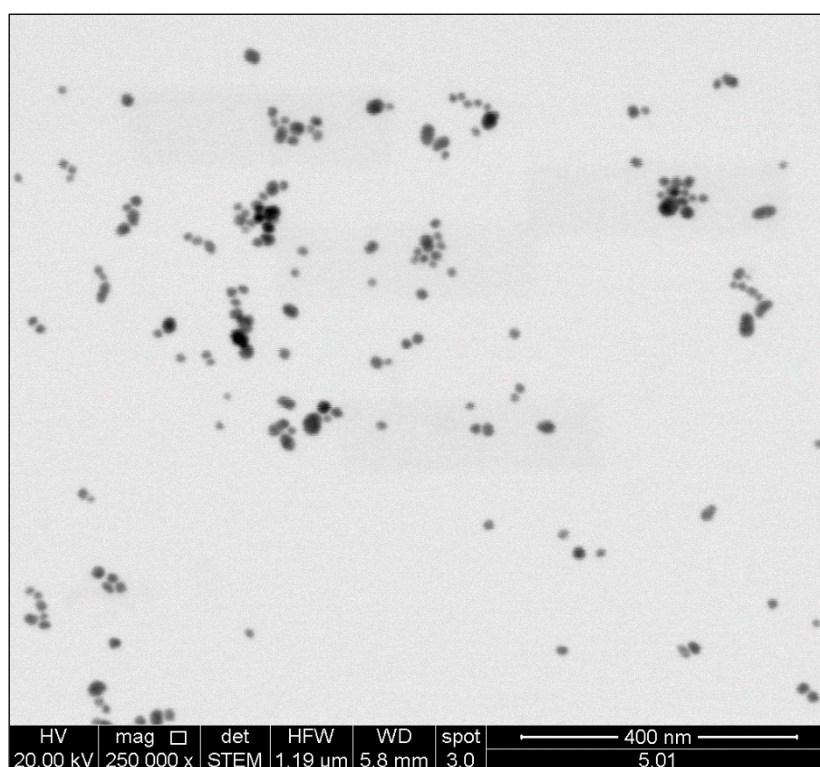

**Figure S9.** TEM of gold nanoparticles stabilized with citrate.

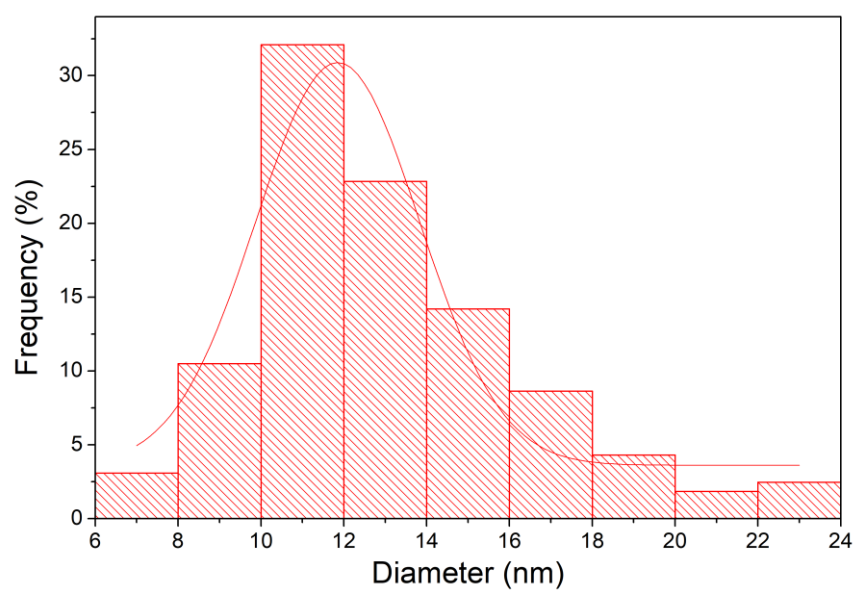

**Figure S10.** Size histogram of gold nanoparticles stabilized with citrate.

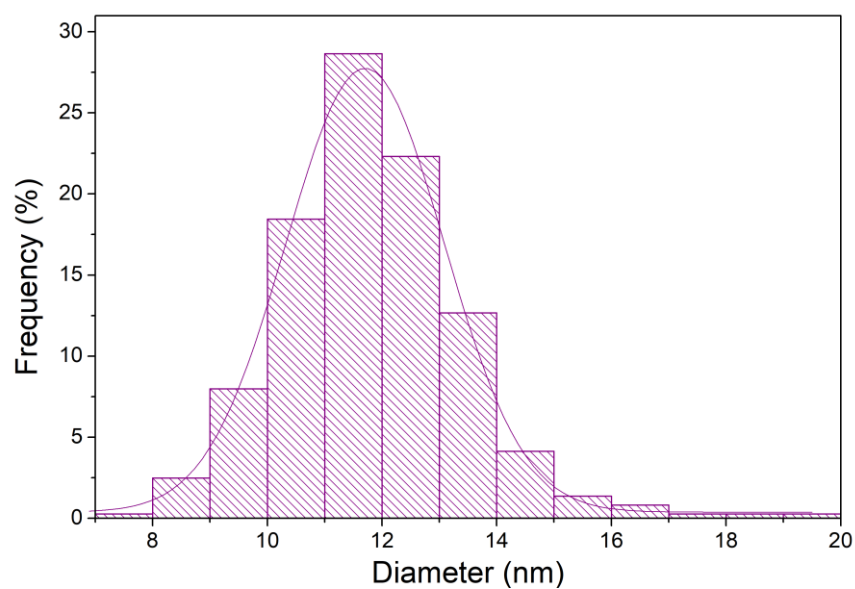

**Figure S11.** Size histogram of gold nanoparticles stabilized with  $\beta$ -cyclodextrin@dacarbazine and PEG.

**Table S3.** Mass of dacarbazine in the supernatant, amount of dacarbazine loaded on gold nanoparticles, and efficiency of dacarbazine included in  $\beta$ -cyclodextrin and loaded on gold nanoparticles

| n       | Dacarbazine in supernatant<br>( $\mu\text{g}$ ) | Dacarbazine loaded in gold nanoparticles<br>( $\mu\text{g}$ ) | Loading efficiency<br>(%) |
|---------|-------------------------------------------------|---------------------------------------------------------------|---------------------------|
| 1       | 0.053                                           | 40.957                                                        | 99.9                      |
| 2       | 0.028                                           | 40.982                                                        | 99.9                      |
| 3       | 0.011                                           | 40.999                                                        | 100.0                     |
| 4       | 0.071                                           | 40.939                                                        | 99.8                      |
| 5       | 0.070                                           | 40.940                                                        | 99.8                      |
| 6       | 0.087                                           | 40.923                                                        | 99.8                      |
| Average | $0.053 \pm 0.029$                               | $40.957 \pm 0.029$                                            | $99.9 \pm 0.1$            |



## S7. Studies using Raman and IR spectroscopy

Table S3 shows the assignment of the vibrational modes corresponding to the signals of the dacarbazine spectrum. Figure S12 shows the FT-IR spectra of dacarbazine,  $\beta$ -cyclodextrin and the  $\beta$ -cyclodextrin@dacarbazine complex.

**Table S4.** Theoretical Raman shift, Raman shift observed in the dacarbazine spectrum and the corresponding vibrational mode.

| Theoretical Raman Shift (cm <sup>-1</sup> ) | Raman shift observed in dacarbazine (cm <sup>-1</sup> ) | Assignment                                                                    |
|---------------------------------------------|---------------------------------------------------------|-------------------------------------------------------------------------------|
| 312                                         | 330                                                     | N-C-C and N-N-C scissoring modes                                              |
| 414                                         | 436                                                     | N-C-O scissoring                                                              |
| 568                                         | 558                                                     | N-N-N scissoring and amide bond in-plane bending                              |
| 602                                         | 638                                                     | N-C-O scissoring and C-N(azide) in-plane bending                              |
|                                             | 694                                                     |                                                                               |
| 799                                         | 802                                                     | C-N-C stretching and ring in-plane deformation                                |
| 800                                         |                                                         | C-N-C stretching and ring in-plane deformation                                |
| 912                                         | 908                                                     | Ring deformation and N-CH <sub>3</sub> stretching                             |
| 955                                         | 964                                                     | Ring in-plane deformation                                                     |
| 1074                                        | 1074                                                    | NH <sub>2</sub> rocking and ring in-plane deformation                         |
| 1100                                        | 1117                                                    | NH <sub>2</sub> rocking and CH <sub>3</sub> rocking                           |
| 1152                                        | 1137                                                    | CH <sub>3</sub> twisting                                                      |
| 1233                                        | 1182                                                    | Aromatic C-N stretching and NH <sub>2</sub> rocking                           |
|                                             | 1222                                                    |                                                                               |
| 1260                                        | 1267                                                    | Aromatic C-H bending and ring deformation                                     |
| 1328                                        | 1302                                                    | C-N-C symmetric stretching                                                    |
| 1348                                        | 1341                                                    | Ring in-plane bending, azide N-N stretching, and C-NH <sub>2</sub> stretching |
| 1387                                        | 1372                                                    | Ring in-plane bending and azide N-N stretching                                |
| 1429                                        | 1402                                                    | CH <sub>3</sub> twisting, azide N-N stretching and ring bending               |
|                                             | 1411                                                    |                                                                               |
| 1452                                        | 1444                                                    | CH <sub>3</sub> scissoring                                                    |
| 1498                                        | 1489                                                    | Azide N-N stretching and CH <sub>3</sub> scissoring                           |
| 1525                                        | 1508                                                    | Ring stretching and CH <sub>3</sub> scissoring                                |
| 1526                                        | 1545                                                    | CH <sub>3</sub> scissoring                                                    |
| 1587                                        | 1585                                                    | NH <sub>2</sub> scissoring                                                    |
| 1607                                        | 1650                                                    | NH <sub>2</sub> scissoring and aromatic C-C stretching                        |
| 1740                                        |                                                         | C=O stretching                                                                |
| 2998                                        | 2920                                                    | CH <sub>3</sub> symmetric stretching                                          |
| 3020                                        |                                                         | CH <sub>3</sub> stretching                                                    |
| 3074                                        |                                                         | CH <sub>3</sub> stretching                                                    |
| 3097                                        |                                                         | CH asymmetric stretching                                                      |
| 3139                                        |                                                         | CH asymmetric stretching                                                      |
| 3142                                        |                                                         | CH asymmetric stretching                                                      |
| 3240                                        | 3144                                                    | Aromatic CH stretching                                                        |
| 3285                                        |                                                         | NH <sub>2</sub> symmetric stretching                                          |
| 3649                                        |                                                         | Aromatic NH stretching                                                        |
| 3727                                        |                                                         | NH <sub>2</sub> asymmetric stretching                                         |

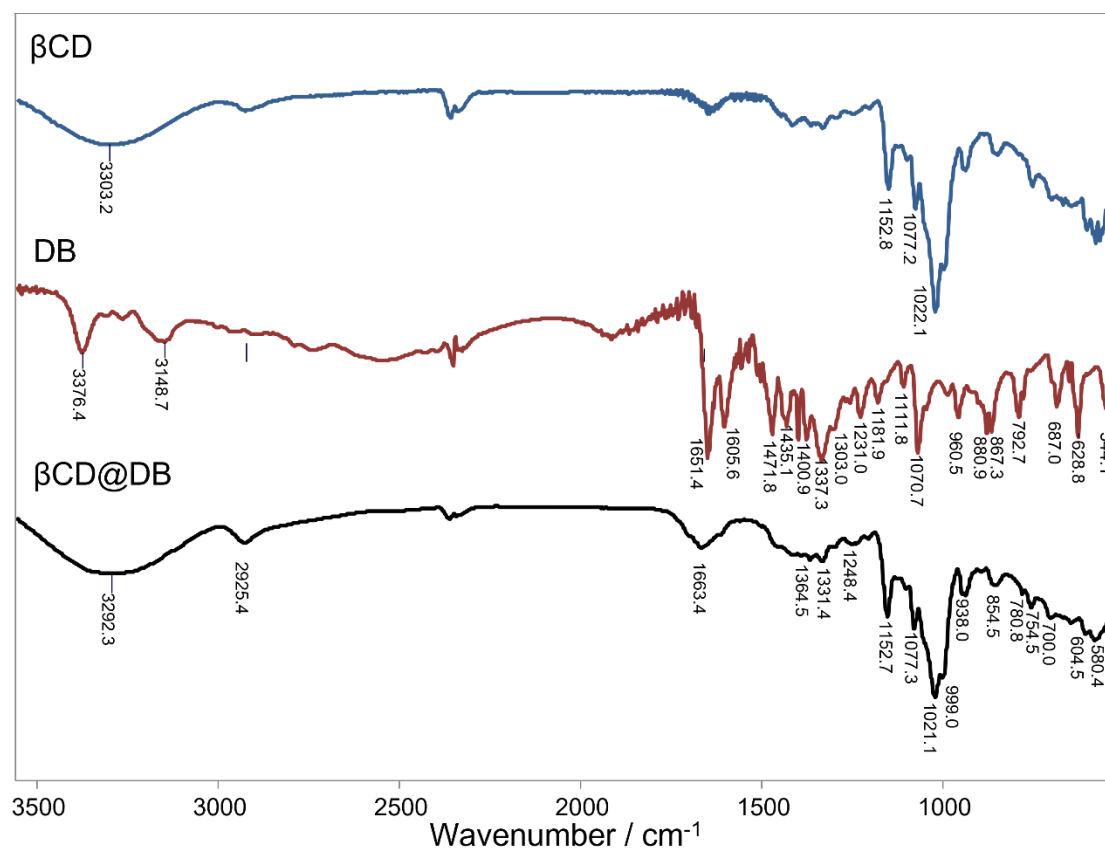

**Figure S12** FT-IR spectra of  $\beta$ -cyclodextrin, dacarbazine, and the  $\beta$ -cyclodextrin@dacarbazine complex.

### S8. Laser irradiation assays

Table S4 shows the mass released of dacarbazine taken from the organic phase at each time interval, and finally the sum of all mass released, referred to as the "total" mass. The mass of dacarbazine loaded into the nanosystem was 39.0  $\mu\text{g}$ .

**Table S5.** Mass released of dacarbazine at each time interval, sum of all mass released, and percentage of average cumulant released mass.

| Time                  | Mass ( $\mu\text{g}$ ) | Mass ( $\mu\text{g}$ ) | Mass ( $\mu\text{g}$ ) | Average mass ( $\mu\text{g}$ )   | Average cumulative mass (%)      |
|-----------------------|------------------------|------------------------|------------------------|----------------------------------|----------------------------------|
| 15                    | 2.63                   | 4.14                   | 3.51                   | $3.4 \pm 0.8$                    | $8.8 \pm 1.9$                    |
| 30                    | 3.86                   | 4.72                   | 3.57                   | $4.1 \pm 0.6$                    | $19.2 \pm 1.5$                   |
| 45                    | 3.97                   | 5.51                   | 3.70                   | $4.4 \pm 1.0$                    | $30.4 \pm 2.5$                   |
| 60                    | 4.01                   | 6.71                   | 3.82                   | $4.8 \pm 1.6$                    | $42.9 \pm 4.1$                   |
| <b>Total released</b> | <b>14.5</b>            | <b>21.1</b>            | <b>14.6</b>            | <b><math>16.7 \pm 3.9</math></b> | <b><math>42.9 \pm 4.1</math></b> |
